# Supplementary material for: Semen Quality Following Long-term Occupational Exposure to Formaldehyde in China
Source: PubMed Central journal article supplement (PMC9453542; doi:10.1001/jamanetworkopen.2022.30359), 2022-09-07
Supplement: jamanetwopen-e2230359-s001.pdf [file jamanetwopen-e2230359-s001.pdf]

## Supplemental Online Content

Lv MQ, Wang HX, Yang YQ, et al. Semen quality following long-term occupational exposure to formaldehyde in China. *JAMA Netw Open.* 2022;5(9):e2230359.  
doi:10.1001/jamanetworkopen.2022.30359

**eTable 1.** Associations of FEI With Semen Quality and Biochemistry Parameters of Seminal Plasma in Different Level of SOD Before and After Adjusting for Confounding Factors

**eTable 2.** Associations of FEI With Semen Quality and Biochemistry Parameters of Seminal Plasma in Different Level of MDA Before and After Adjusting for Confounding Factors

**eTable 3.** Associations of FEI With Semen Quality and Biochemistry Parameters of Seminal Plasma in Different Level of GSHPx Before and After Adjusting for Confounding Factors

**eTable 4.** Effect Estimates and 95% CIs of Semen Quality Parameters With a 1-Unit Increase in FEI With and Without Adjustment for Smoking and Alcohol Consumption

**eTable 5.** Effect Estimates and 95% CIs of Semen Quality Parameters Associated With a 1-Unit Increase in FEI in Each Subgroup

**eFigure 1.** Flowchart of Participant Recruitment

**eFigure 2.** Distribution of Sociodemographic Characteristics With and Without FA Exposure

**eFigure 3.** Percentage Changes in Semen Quality Associated With a 1-Unit Increase in FEI Before and After Adjusting for Confounding Factors

**eFigure 4.** Heatmap of the Associations Between FEI and Semen Quality in Different Groups of Antioxidant Defenses Before and After Adjusting for Confounding Factors

**eFigure 5.** Distribution of Semen Quality With and Without Occupational FA Exposure

**eFigure 6.** Significant Associations of FEI With Kinematic Sperm Parameters

This supplemental material has been provided by the authors to give readers additional information about their work.

**eTable 1. Associations of FEI With Semen Quality and Biochemistry Parameters of Seminal Plasma in Different Level of SOD Before and After Adjusting for Confounding Factors<sup>#</sup>**

|      | Low level of SOD                 |       |        |                              |                                  |       |        |                              | High level of SOD                |       |        |                              |                                  |       |        |                              |
|------|----------------------------------|-------|--------|------------------------------|----------------------------------|-------|--------|------------------------------|----------------------------------|-------|--------|------------------------------|----------------------------------|-------|--------|------------------------------|
|      | Crude                            |       |        |                              | Adjusted                         |       |        |                              | Crude                            |       |        |                              | Adjusted                         |       |        |                              |
|      | Effect estimate <sup>b</sup> (%) | 95%CI |        | P value                      | Effect estimate <sup>b</sup> (%) | 95%CI |        | P value                      | Effect estimate <sup>b</sup> (%) | 95%CI |        | P value                      | Effect estimate <sup>b</sup> (%) | 95%CI |        | P value                      |
|      |                                  | lower | higher |                              |                                  | lower | higher |                              |                                  | lower | Higher |                              |                                  | lower | higher |                              |
| TSM  | -0.99                            | -1.00 | -0.97  | <u>&lt;0.001<sup>ε</sup></u> | -0.99                            | -1.00 | -0.95  | <u>&lt;0.001<sup>ε</sup></u> | -0.94                            | -0.99 | 0.35   | <u>0.076</u>                 | -0.97                            | -0.99 | 0.56   | <u>0.066</u>                 |
| PSM  | -0.99                            | -1.00 | -0.96  | <u>&lt;0.001<sup>ε</sup></u> | -0.99                            | -0.99 | -0.95  | <u>&lt;0.001<sup>ε</sup></u> | -0.91                            | -0.99 | 0.38   | <u>0.083</u>                 | -0.96                            | -0.99 | 1.75   | <u>0.070</u>                 |
| VCL  | -0.05                            | -0.09 | -0.01  | <u>0.009<sup>ε</sup></u>     | -0.05                            | -0.09 | -0.01  | <u>0.015<sup>ε</sup></u>     | -0.02                            | -0.06 | 0.00   | <u>0.147</u>                 | -0.02                            | -0.06 | 0.00   | <u>0.103</u>                 |
| VSL  | -0.08                            | -0.13 | -0.03  | <u>0.003<sup>ε</sup></u>     | -0.08                            | -0.13 | -0.03  | <u>0.002<sup>ε</sup></u>     | -0.03                            | -0.08 | 0.00   | <u>0.086</u>                 | -0.04                            | -0.09 | 0.00   | <u>0.055</u>                 |
| VAP  | -0.08                            | -0.13 | -0.03  | <u>0.002<sup>ε</sup></u>     | -0.08                            | -0.13 | -0.03  | <u>0.002<sup>ε</sup></u>     | -0.04                            | -0.08 | 0.00   | <u>0.066</u>                 | -0.05                            | -0.09 | 0.07   | <u>0.069</u>                 |
| BCF  | 0.26                             | -0.20 | 1.00   | <u>0.313</u>                 | 0.38                             | -0.11 | 1.16   | <u>0.155</u>                 | 0.38                             | -0.01 | 0.94   | <u>0.058</u>                 | 0.44                             | -0.02 | 1.05   | <u>0.068</u>                 |
| NSM  | -0.93                            | -0.99 | -0.50  | <u>0.009<sup>ε</sup></u>     | -0.91                            | -0.98 | -0.38  | <u>0.016<sup>ε</sup></u>     | -0.97                            | -0.99 | -0.79  | <u>0.001<sup>ε</sup></u>     | -0.97                            | -0.99 | -0.80  | <u>&lt;0.001<sup>ε</sup></u> |
| DFI  | 0.10                             | 0.05  | 0.16   | <u>&lt;0.001<sup>ε</sup></u> | 0.10                             | 0.04  | 0.16   | <u>&lt;0.001<sup>ε</sup></u> | 0.05                             | -0.00 | 0.10   | <u>0.074</u>                 | 0.05                             | -0.00 | 0.11   | <u>0.057</u>                 |
| NG   | -0.34                            | -0.48 | -0.16  | <u>0.001<sup>ε</sup></u>     | -0.31                            | -0.46 | -0.13  | <u>0.002<sup>ε</sup></u>     | 0.02                             | -0.17 | 0.25   | <u>0.848</u>                 | 0.01                             | -0.18 | 0.25   | <u>0.882</u>                 |
| Zinc | -0.64                            | -0.70 | -0.57  | <u>&lt;0.001<sup>ε</sup></u> | -0.64                            | -0.70 | -0.56  | <u>&lt;0.001<sup>ε</sup></u> | -0.54                            | -0.62 | -0.46  | <u>&lt;0.001<sup>ε</sup></u> | -0.54                            | -0.61 | -0.45  | <u>&lt;0.001<sup>ε</sup></u> |

<sup>a</sup> Confounding factors used in the adjusting model contained age, BMI, income, smoking status, and alcohol consumption.

<sup>b</sup> Effect estimates represented their percentage changes in association with a unit increase in FEI.

Abbreviations: TSM, total sperm motility; PSM, progressive sperm motility; NSM, normal sperm morphology; DFI, DNA fragmentation index; VCL, curvilinear velocity; VSL, straight line velocity; VAP, average path velocity; BCF, beat cross frequency; NG, Neutral glucosidase.

<sup>ε</sup> P<0.05.

**Table 2. Associations of FEI With Semen Quality and Biochemistry Parameters of Seminal Plasma in Different Level of MDA Before and After Adjusting for Confounding Factors<sup>a</sup>**

|      | Low level of MDA                 |       |        |                              |                                  |       |        |                              | High level of MDA                |       |        |                              |                                  |       |        |                              |
|------|----------------------------------|-------|--------|------------------------------|----------------------------------|-------|--------|------------------------------|----------------------------------|-------|--------|------------------------------|----------------------------------|-------|--------|------------------------------|
|      | Crude                            |       |        |                              | Adjusted                         |       |        |                              | Crude                            |       |        |                              | Adjusted                         |       |        |                              |
|      | Effect estimate <sup>b</sup> (%) | 95%CI |        | P value                      | Effect estimate <sup>b</sup> (%) | 95%CI |        | P value                      | Effect estimate <sup>b</sup> (%) | 95%CI |        | P value                      | Effect estimate <sup>b</sup> (%) | 95%CI |        | P value                      |
|      |                                  | lower | higher |                              |                                  | Lower | higher |                              |                                  | lower | higher |                              |                                  | lower | higher |                              |
| TSM  | -0.84                            | -0.99 | 2.39   | <u>0.235</u>                 | -0.85                            | -0.99 | 1.97   | <u>0.205</u>                 | -0.99                            | -0.99 | -0.97  | <u>&lt;0.001<sup>c</sup></u> | -0.99                            | -0.99 | -0.97  | <u>&lt;0.001<sup>c</sup></u> |
| PSM  | -0.79                            | -0.98 | 1.74   | <u>0.228</u>                 | -0.85                            | -0.98 | 1.00   | <u>0.149</u>                 | -0.99                            | -0.99 | -0.97  | <u>&lt;0.001<sup>c</sup></u> | -0.99                            | -0.99 | -0.97  | <u>&lt;0.001<sup>c</sup></u> |
| VCL  | -0.01                            | -0.05 | 0.02   | <u>0.354</u>                 | -0.02                            | -0.05 | 0.01   | <u>0.247</u>                 | -0.05                            | -0.08 | -0.02  | <u>0.002<sup>c</sup></u>     | -0.04                            | -0.08 | -0.01  | <u>0.003<sup>c</sup></u>     |
| VSL  | -0.04                            | -0.08 | 0.00   | <u>0.078</u>                 | -0.05                            | -0.09 | 0.00   | <u>0.061</u>                 | -0.07                            | -0.11 | -0.03  | <u>&lt;0.001<sup>c</sup></u> | -0.07                            | -0.11 | -0.03  | <u>&lt;0.001<sup>c</sup></u> |
| VAP  | -0.04                            | -0.08 | 0.00   | <u>0.073</u>                 | -0.05                            | -0.09 | 0.00   | <u>0.053</u>                 | -0.08                            | -0.11 | -0.04  | <u>&lt;0.001<sup>c</sup></u> | -0.07                            | -0.11 | -0.03  | <u>&lt;0.001<sup>c</sup></u> |
| BCF  | 0.25                             | -0.11 | 0.78   | <u>0.196</u>                 | 0.29                             | -0.08 | 0.83   | <u>0.145</u>                 | 0.61                             | 0.15  | 1.26   | <u>0.006<sup>c</sup></u>     | 0.64                             | 0.17  | 1.30   | <u>0.004<sup>c</sup></u>     |
| NSM  | -0.70                            | -0.95 | 0.92   | <u>0.198</u>                 | -0.76                            | -0.96 | 0.64   | <u>0.144</u>                 | -0.98                            | -0.99 | -0.92  | <u>&lt;0.001<sup>c</sup></u> | -0.97                            | -0.99 | -0.91  | <u>&lt;0.001<sup>c</sup></u> |
| DFI  | 0.02                             | -0.02 | 0.07   | <u>0.418</u>                 | 0.01                             | -0.03 | 0.06   | <u>0.553</u>                 | 0.11                             | 0.07  | 0.15   | <u>&lt;0.001<sup>c</sup></u> | 0.10                             | 0.06  | 0.15   | <u>&lt;0.001<sup>c</sup></u> |
| NG   | -0.01                            | -0.21 | 0.22   | <u>0.876</u>                 | -0.00                            | -0.20 | 0.23   | <u>0.937</u>                 | -0.32                            | -0.42 | -0.19  | <u>&lt;0.001<sup>c</sup></u> | -0.29                            | -0.41 | -0.14  | <u>&lt;0.001<sup>c</sup></u> |
| Zinc | -0.53                            | -0.61 | -0.44  | <u>&lt;0.001<sup>c</sup></u> | -0.51                            | -0.59 | -0.42  | <u>&lt;0.001<sup>c</sup></u> | -0.59                            | -0.64 | -0.53  | <u>&lt;0.001<sup>c</sup></u> | -0.59                            | -0.65 | -0.52  | <u>&lt;0.001<sup>c</sup></u> |

<sup>a</sup> Confounding factors used in the adjusting model contained age, BMI, income, smoking status, and alcohol consumption.

<sup>b</sup> Effect estimates represented their percentage changes in association with a unit increase in FEI.

Abbreviations: TSM, total sperm motility; PSM, progressive sperm motility; NSM, normal sperm morphology; DFI, DNA fragmentation index; VCL, curvilinear velocity; VSL, straight line velocity; VAP, average path velocity; BCF, beat cross frequency; NG, Neutral glucosidase.

<sup>c</sup>  $P < 0.05$ .

**eTable 3. Associations of FEI With Semen Quality and Biochemistry Parameters of Seminal Plasma in Different Level of GSHPx Before and After Adjusting for Confounding Factors<sup>a</sup>**

|      | Low level of GSHPx               |       |        |                              |                                  |       |        |                              | High level of GSHPx              |       |        |                              |                                  |       |        |                              |
|------|----------------------------------|-------|--------|------------------------------|----------------------------------|-------|--------|------------------------------|----------------------------------|-------|--------|------------------------------|----------------------------------|-------|--------|------------------------------|
|      | Crude                            |       |        |                              | Adjusted                         |       |        |                              | Crude                            |       |        |                              | Adjusted                         |       |        |                              |
|      | Effect estimate <sup>b</sup> (%) | 95%CI |        | P value                      | Effect estimate <sup>b</sup> (%) | 95%CI |        | P value                      | Effect estimate <sup>b</sup> (%) | 95%CI |        | P value                      | Effect estimate <sup>b</sup> (%) | 95%CI |        | P value                      |
|      |                                  | lower | higher |                              |                                  | lower | higher |                              |                                  | Lower | higher |                              |                                  | lower | higher |                              |
| TSM  | -0.99                            | -0.99 | -0.98  | <u>&lt;0.001<sup>c</sup></u> | -0.06                            | -0.08 | -0.03  | <u>&lt;0.001<sup>c</sup></u> | -0.93                            | -0.99 | 0.41   | <u>0.083</u>                 | -0.02                            | -0.04 | 0.00   | <u>0.088</u>                 |
| PSM  | -0.99                            | -0.99 | -0.98  | <u>&lt;0.001<sup>c</sup></u> | -0.06                            | -0.09 | -0.04  | <u>&lt;0.001<sup>c</sup></u> | -0.90                            | -0.99 | 0.35   | <u>0.082</u>                 | -0.02                            | -0.04 | 0.00   | <u>0.073</u>                 |
| VCL  | -0.05                            | -0.09 | -0.01  | <u>0.007<sup>c</sup></u>     | -0.04                            | -0.08 | -0.00  | <u>0.019<sup>c</sup></u>     | -0.03                            | -0.07 | 0.00   | <u>0.055</u>                 | -0.03                            | -0.06 | 0.00   | <u>0.083</u>                 |
| VSL  | -0.08                            | -0.13 | -0.03  | <u>0.001<sup>c</sup></u>     | -0.07                            | -0.12 | -0.02  | <u>0.003<sup>c</sup></u>     | -0.04                            | -0.09 | 0.00   | <u>0.051</u>                 | -0.04                            | -0.09 | 0.00   | <u>0.052</u>                 |
| VAP  | -0.08                            | -0.13 | -0.03  | <u>0.001<sup>c</sup></u>     | -0.07                            | -0.12 | -0.02  | <u>0.003<sup>c</sup></u>     | -0.05                            | -0.09 | 0.00   | <u>0.065</u>                 | -0.05                            | -0.09 | 0.00   | <u>0.136</u>                 |
| BCF  | 0.33                             | -0.11 | 1.00   | <u>0.172</u>                 | 0.39                             | -0.07 | 1.08   | <u>0.109</u>                 | 0.36                             | -0.06 | 0.99   | <u>0.109</u>                 | 0.31                             | -0.10 | 0.93   | <u>0.160</u>                 |
| NSM  | -0.99                            | -0.99 | -0.96  | <u>&lt;0.001<sup>c</sup></u> | -0.99                            | -0.99 | -0.95  | <u>&lt;0.001<sup>c</sup></u> | -0.60                            | -0.94 | 2.11   | <u>0.376</u>                 | -0.41                            | -0.92 | 3.81   | <u>0.615</u>                 |
| DFI  | 0.16                             | 0.10  | 0.21   | <u>&lt;0.001<sup>c</sup></u> | 0.14                             | 0.09  | 0.20   | <u>&lt;0.001<sup>c</sup></u> | 0.02                             | -0.02 | 0.07   | <u>0.425</u>                 | 0.01                             | -0.03 | 0.06   | <u>0.565</u>                 |
| NG   | -0.36                            | -0.47 | -0.22  | <u>&lt;0.001<sup>c</sup></u> | -0.31                            | -0.44 | -0.15  | <u>&lt;0.001<sup>c</sup></u> | 0.06                             | -0.15 | 0.34   | <u>0.582</u>                 | 0.03                             | -0.18 | 0.30   | <u>0.778</u>                 |
| Zinc | -0.63                            | -0.68 | -0.58  | <u>&lt;0.001<sup>c</sup></u> | -0.62                            | -0.67 | -0.56  | <u>&lt;0.001<sup>c</sup></u> | -0.55                            | -0.62 | -0.45  | <u>&lt;0.001<sup>c</sup></u> | -0.54                            | -0.62 | -0.45  | <u>&lt;0.001<sup>c</sup></u> |

<sup>a</sup> Confounding factors used in the adjusting model contained age, BMI, income, smoking status, and alcohol consumption.

<sup>b</sup> Effect estimates represented their percentage changes in association with a unit increase in FEI.

Abbreviations: TSM, total sperm motility; PSM, progressive sperm motility; NSM, normal sperm morphology; DFI, DNA fragmentation index; VCL, curvilinear velocity; VSL, straight line velocity; VAP, average path velocity; BCF, beat cross frequency; NG, Neutral glucosidase.

<sup>c</sup>  $P < 0.05$ .

**eTable 4. Effect Estimates and 95% CIs of Semen Quality Parameters With a 1-Unit Increase in FEI With and Without Adjustment for Smoking and Alcohol Consumption**

|      | Age (year)                       |       |        |                     |                                  |       |        |                     |
|------|----------------------------------|-------|--------|---------------------|----------------------------------|-------|--------|---------------------|
|      | Model 1                          |       |        |                     | Model 2                          |       |        |                     |
|      | Effect estimate <sup>a</sup> (%) | 95%CI |        | P value             | Effect estimate <sup>a</sup> (%) | 95%CI |        | P value             |
|      |                                  | lower | higher |                     |                                  | lower | higher |                     |
| TSM  | -0.99                            | -1.00 | -0.98  | <0.001 <sup>b</sup> | -0.99                            | -1.00 | -0.99  | <0.001 <sup>b</sup> |
| PSM  | -0.99                            | -0.99 | -0.98  | <0.001 <sup>b</sup> | -0.99                            | -1.00 | -0.98  | <0.001 <sup>b</sup> |
| VCL  | -0.05                            | -0.08 | -0.02  | <0.001 <sup>b</sup> | -0.06                            | -0.09 | -0.03  | <0.001 <sup>b</sup> |
| VSL  | -0.08                            | -0.11 | -0.04  | <0.001 <sup>b</sup> | -0.09                            | -0.16 | -0.04  | <0.001 <sup>b</sup> |
| VAP  | -0.08                            | -0.11 | -0.04  | <0.001 <sup>b</sup> | -0.09                            | -0.14 | -0.05  | <0.001 <sup>b</sup> |
| BCF  | 0.57                             | 0.18  | 1.08   | 0.003 <sup>b</sup>  | 0.53                             | 0.18  | 1.01   | 0.007 <sup>b</sup>  |
| NSM  | -0.98                            | -0.99 | -0.93  | <0.001 <sup>b</sup> | -0.98                            | -0.99 | -0.93  | <0.001 <sup>b</sup> |
| DFI  | 0.10                             | 0.06  | 0.14   | <0.001 <sup>b</sup> | 0.12                             | 0.07  | 0.12   | <0.001 <sup>b</sup> |
| NG   | -0.24                            | -0.35 | -0.10  | 0.009 <sup>b</sup>  | -0.33                            | -0.52 | -0.12  | 0.015 <sup>b</sup>  |
| Zinc | -0.61                            | -0.65 | -0.56  | <0.001 <sup>b</sup> | -0.53                            | -0.66 | -0.50  | <0.001 <sup>b</sup> |

Model 1: This model was analyzed adjusting for confounding factors including age, BMI, income, smoking status, and alcohol consumption.

Model 2: This model was analyzed adjusting for confounding factors including age, BMI, income.

<sup>a</sup> Effect estimates represented their percentage changes in association with a unit increase in FEI.

Abbreviations: TSM, total sperm motility; PSM, progressive sperm motility; NSM, normal sperm morphology; DFI, DNA fragmentation index; VCL, curvilinear velocity; VSL, straight line velocity; VAP, average path velocity; BCF, beat cross frequency; NG, Neutral glucosidase.

<sup>b</sup>  $P < 0.05$ .

**eTable 5. Effect Estimates and 95% CIs of Semen Quality Parameters Associated With a 1-Unit Increase in FEI in Each Subgroup<sup>a</sup>**

|      | Age (year)                       |       |        |                     |                                  |       |        |                     | BMI                              |       |        |                     |                                  |       |        |                     |
|------|----------------------------------|-------|--------|---------------------|----------------------------------|-------|--------|---------------------|----------------------------------|-------|--------|---------------------|----------------------------------|-------|--------|---------------------|
|      | ≤30                              |       |        |                     | >30                              |       |        |                     | ≤24 (underweight or normal)      |       |        |                     | >24 (overweight or obese)        |       |        |                     |
|      | Effect estimate <sup>b</sup> (%) | 95%CI |        | P value             | Effect estimate <sup>b</sup> (%) | 95%CI |        | P value             | Effect estimate <sup>b</sup> (%) | 95%CI |        | P value             | Effect estimate <sup>b</sup> (%) | 95%CI |        | P value             |
|      |                                  | lower | higher |                     |                                  | lower | higher |                     |                                  | lower | higher |                     |                                  | lower | higher |                     |
| TSM  | -0.99                            | -1.00 | -0.97  | <0.001 <sup>c</sup> | -0.99                            | -1.00 | -0.96  | <0.001 <sup>c</sup> | -0.99                            | -1.00 | -0.96  | <0.001 <sup>c</sup> | -0.99                            | -1.00 | -0.98  | <0.001 <sup>c</sup> |
| PSM  | -0.99                            | -0.99 | -0.95  | <0.001 <sup>c</sup> | -0.99                            | -1.00 | -0.93  | <0.001 <sup>c</sup> | -0.99                            | -1.00 | -0.96  | <0.001 <sup>c</sup> | -0.99                            | -0.99 | -0.95  | <0.001 <sup>c</sup> |
| VCL  | -0.05                            | -0.08 | -0.01  | <0.001 <sup>c</sup> | -0.05                            | -0.09 | -0.00  | 0.032 <sup>c</sup>  | -0.05                            | -0.09 | -0.01  | <0.001 <sup>c</sup> | -0.04                            | -0.08 | -0.01  | 0.017 <sup>c</sup>  |
| VSL  | -0.07                            | -0.11 | -0.03  | <0.001 <sup>c</sup> | -0.07                            | -0.13 | -0.01  | 0.014 <sup>c</sup>  | -0.09                            | -0.13 | -0.04  | <0.001 <sup>c</sup> | -0.06                            | -0.10 | -0.01  | 0.006 <sup>c</sup>  |
| VAP  | -0.07                            | -0.11 | -0.03  | <0.001 <sup>c</sup> | -0.08                            | -0.13 | -0.02  | 0.013 <sup>c</sup>  | -0.09                            | -0.13 | -0.04  | <0.001 <sup>c</sup> | -0.06                            | -0.11 | -0.02  | 0.004 <sup>c</sup>  |
| BCF  | 0.52                             | 0.09  | 1.13   | 0.007 <sup>c</sup>  | 0.52                             | -0.06 | 1.48   | 0.090               | 1.05                             | 0.36  | 2.08   | <0.001 <sup>c</sup> | 0.20                             | -0.17 | 0.75   | 0.347               |
| NSM  | -0.96                            | -0.99 | -0.80  | <0.001 <sup>c</sup> | -0.98                            | -0.99 | -0.92  | <0.001 <sup>c</sup> | -0.97                            | -0.99 | -0.85  | <0.001 <sup>c</sup> | -0.98                            | -0.99 | -0.91  | <0.001 <sup>c</sup> |
| DFI  | 0.08                             | 0.04  | 0.13   | <0.001 <sup>c</sup> | 0.13                             | 0.07  | 0.20   | <0.001 <sup>c</sup> | 0.11                             | 0.06  | 0.17   | <0.001 <sup>c</sup> | 0.09                             | 0.04  | 0.14   | <0.001 <sup>c</sup> |
| NG   | -0.18                            | -0.32 | -0.01  | 0.033 <sup>c</sup>  | -0.32                            | -0.49 | -0.09  | 0.014 <sup>c</sup>  | -0.30                            | -0.44 | -0.12  | <0.012 <sup>c</sup> | -0.17                            | -0.34 | 0.03   | 0.047 <sup>c</sup>  |
| Zinc | -0.58                            | -0.64 | -0.51  | <0.001 <sup>c</sup> | -0.65                            | -0.71 | -0.58  | <0.001 <sup>c</sup> | -0.61                            | -0.67 | -0.53  | <0.001 <sup>c</sup> | -0.62                            | -0.68 | -0.55  | <0.001 <sup>c</sup> |

<sup>a</sup> This model was analyzed adjusting for confounding factors including age, BMI, income, smoking status, and alcohol consumption.

<sup>b</sup> Effect estimates represented their percentage changes in association with a unit increase in FEI.

Abbreviations: TSM, total sperm motility; PSM, progressive sperm motility; NSM, normal sperm morphology; DFI, DNA fragmentation index; VCL, curvilinear velocity; VSL, straight line velocity; VAP, average path velocity; BCF, beat cross frequency; NG, Neutral glucosidase.

<sup>c</sup> P<0.05.

**Figure 1. Flowchart of Participant Recruitment**

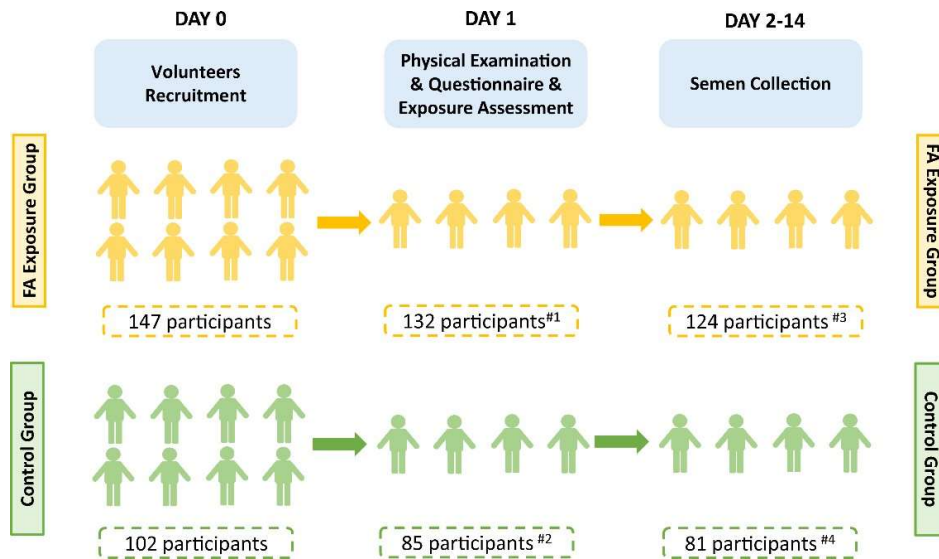

#1: 15 individuals were excluded, of which 4 participants lived in newly built or decorated rooms, 6 participants had genital abnormalities or other chronic diseases, and 5 participants did not complete the questionnaires.

#2: 17 individuals were excluded, of which 3 participants lived in newly built or decorated rooms, 5 participants had genital abnormalities or other chronic diseases, and 9 participants did not complete the questionnaires.

#3: 8 individuals were excluded since the incomplete collection of semen.

#4: 4 individuals were excluded since the incomplete collection of semen.

**Figure 2. Distribution of Sociodemographic Characteristics With and Without FA Exposure**

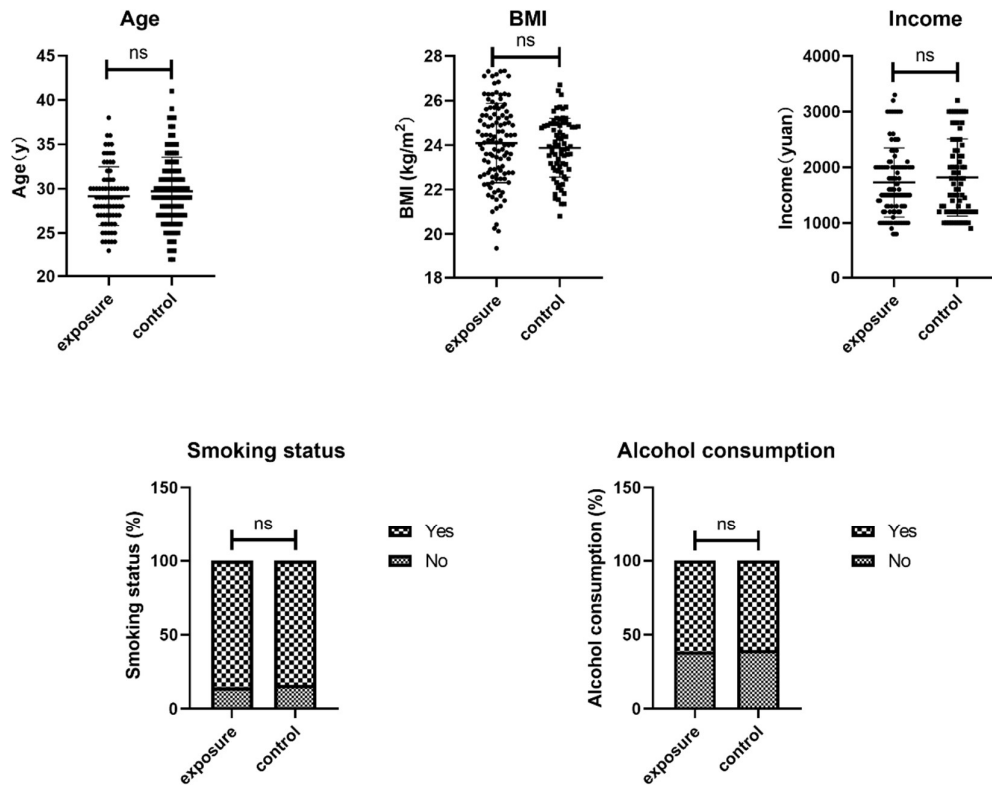

Abbreviations: BMI, body mass index.

ns:  $P > 0.05$ .



**Figure 3. Percentage Changes in Semen Quality Associated With a 1-Unit Increase in FEI Before and After Adjusting for Confounding Factors**

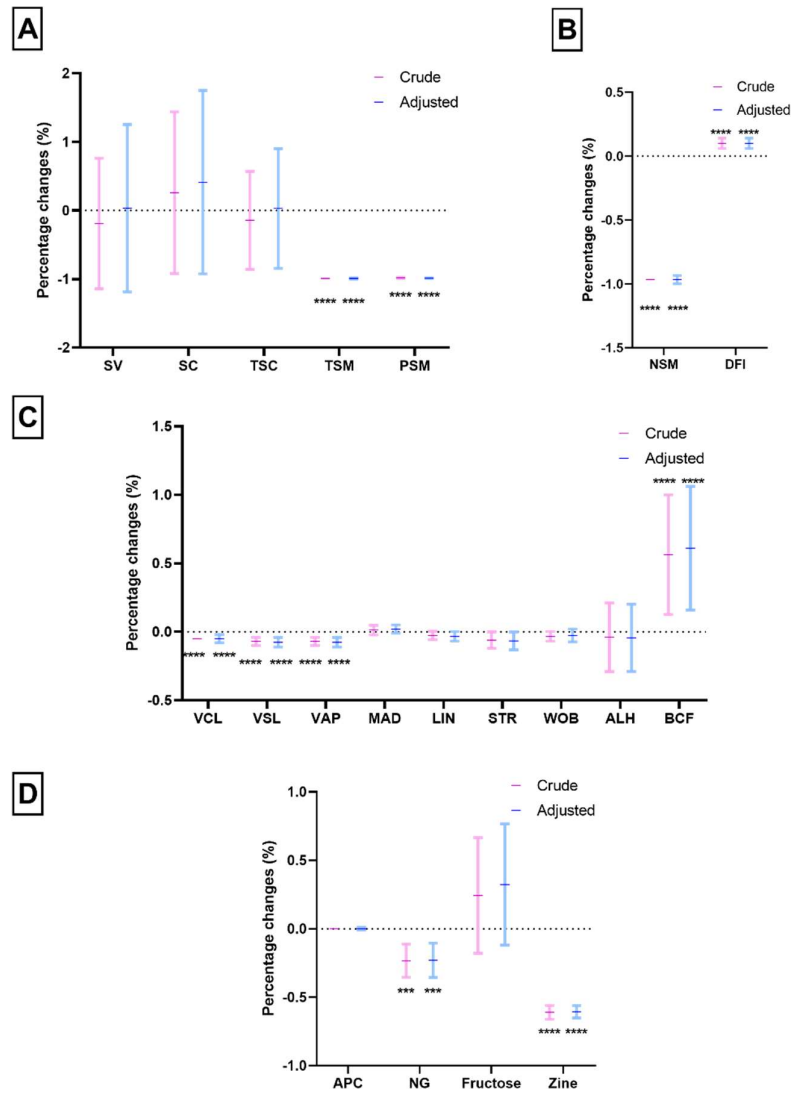

(A) conventional sperm parameters, (B) kinematic sperm parameters, (C) sperm morphology and DNA fragmentation index, (D) biochemistry parameters in seminal plasma.

Abbreviations: SV, semen volume; SC, sperm concentration; TSC, total sperm count; TSM, total sperm motility; PSM, progressive sperm motility; NSM, normal sperm morphology; DFI, DNA fragmentation index; VCL, curvilinear velocity; VSL, straight line velocity; LIN, linearity; VAP, average path velocity; STR, straightness; MAD, mean angular displacement; WOB, wobble; ALH, amplitude of lateral head displacement; BCF, beat cross frequency; APC, acid phosphatase; NG, Neutral glucosidase.

\*\*\*:  $P < 0.005$ , \*\*\*\*:  $P < 0.001$ .

**eFigure 4. Heatmap of the Associations Between FEI and Semen Quality in Different Groups of Antioxidant Defenses Before and After Adjusting for Confounding Factors**

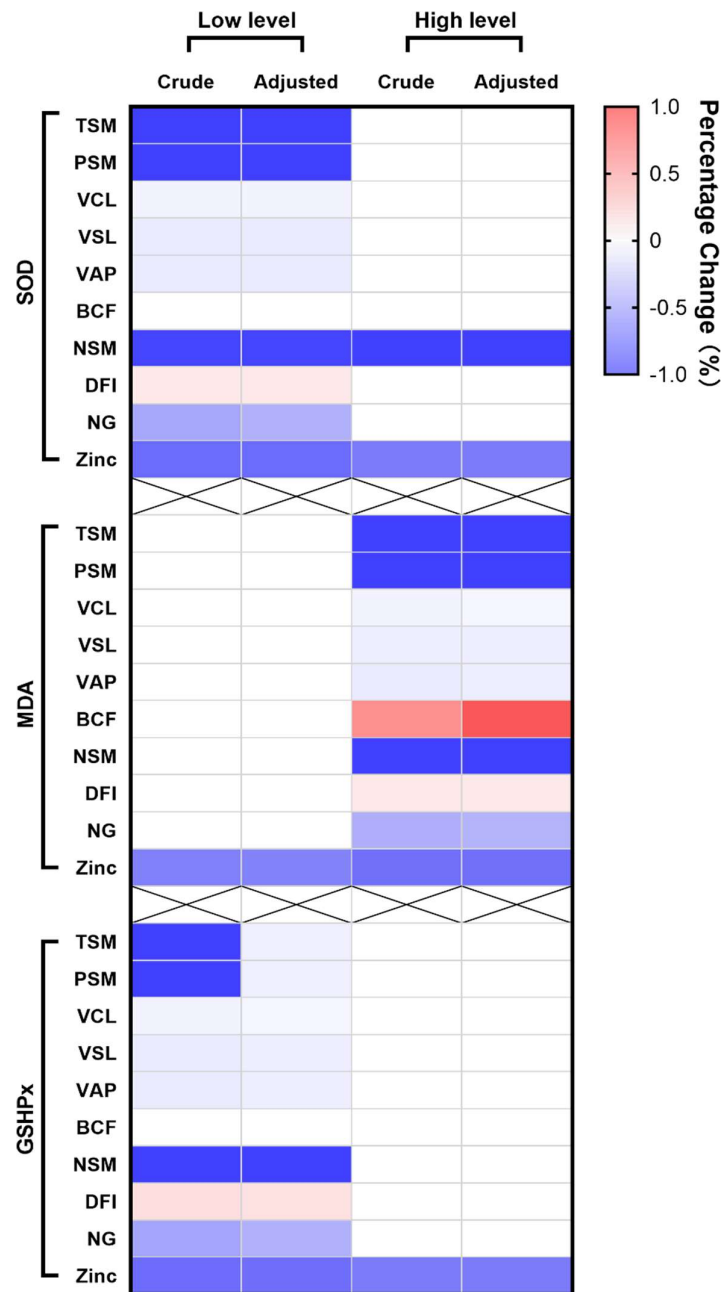

Blue indicated that a unit increase in FEI was associated with a significant decrease in this factor, pink indicated that a unit increase in FEI was associated with a significant increase in this factor, white indicated that a unit increase in FEI was not associated with this factor.

Abbreviations: TSM, total sperm motility; PSM, progressive sperm motility; NSM, normal sperm morphology; DFI, DNA fragmentation index; VCL, curvilinear velocity; VSL, straight line velocity; VAP, average path velocity; BCF, beat cross frequency; NG, Neutral glucosidase.

**eFigure 5. Distribution of Semen Quality With and Without Occupational FA Exposure**

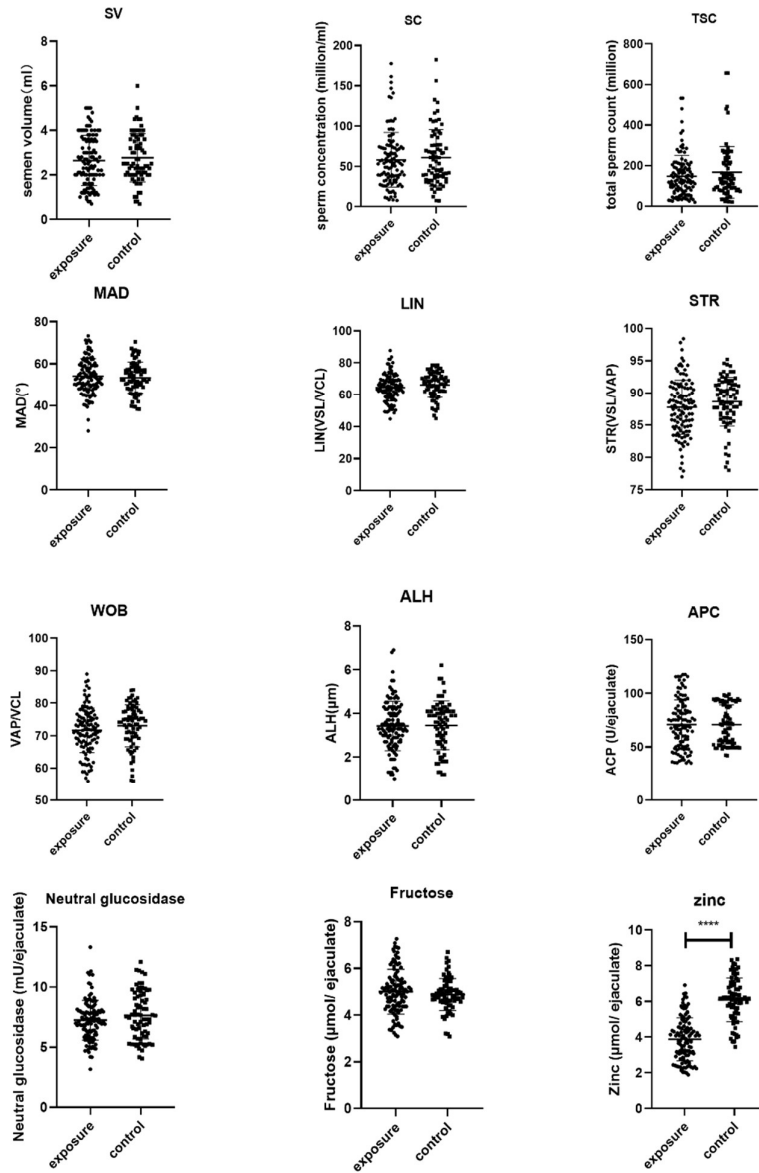

Abbreviations: SV, semen volume; SC, sperm concentration; TSC, total sperm count; LIN, linearity; STR, straightness; MAD, mean angular displacement; WOB, wobble; ALH, amplitude of lateral head displacement; APC, acid phosphatase.

\*\*\*\*:  $P < 0.001$ .

**eFigure 6. Significant Associations of FEI With Kinematic Sperm Parameters**

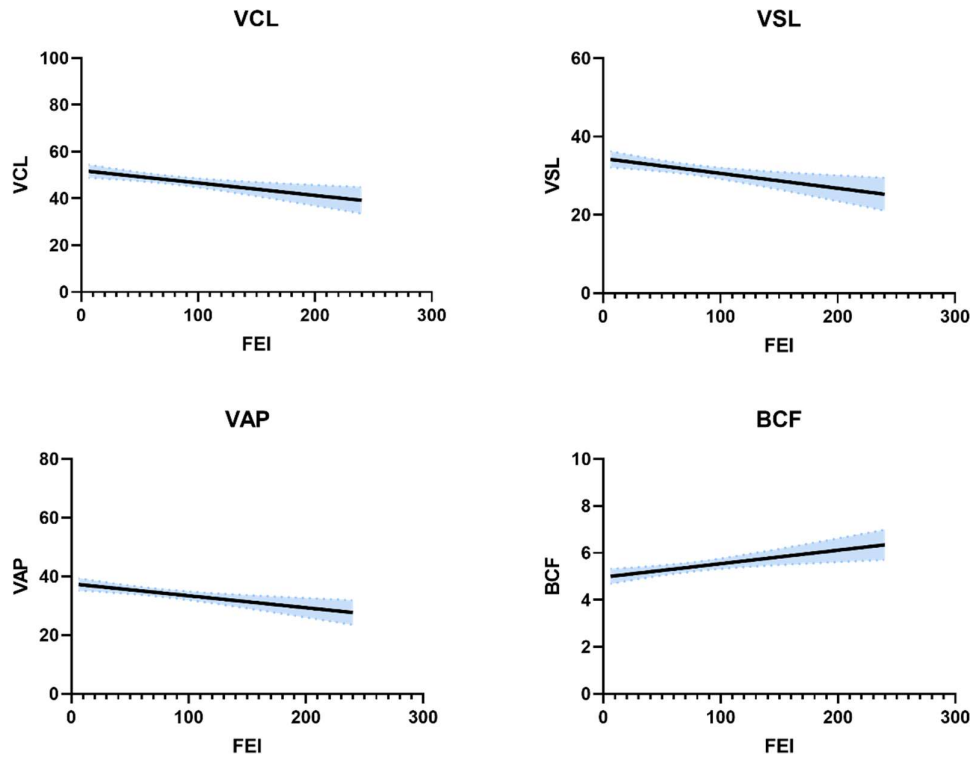

In all graphs, solid curves indicate beta and shaded areas indicate 95% CIs.

Abbreviations: VCL, curvilinear velocity; VSL, straight line velocity; VAP, average path velocity; BCF, beat cross frequency.
